# Supplementary material
Source: HighWire-hosted journal article supplement (https://jnm.snmjournals.org/highwire/filestream/95365/field_highwire_adjunct_files/0/212563_Supplemental_Data.pdf)
Supplement: 212563_Supplemental_Data.pdf [file 212563_Supplemental_Data.pdf]

**Supplemental Fig. 1**

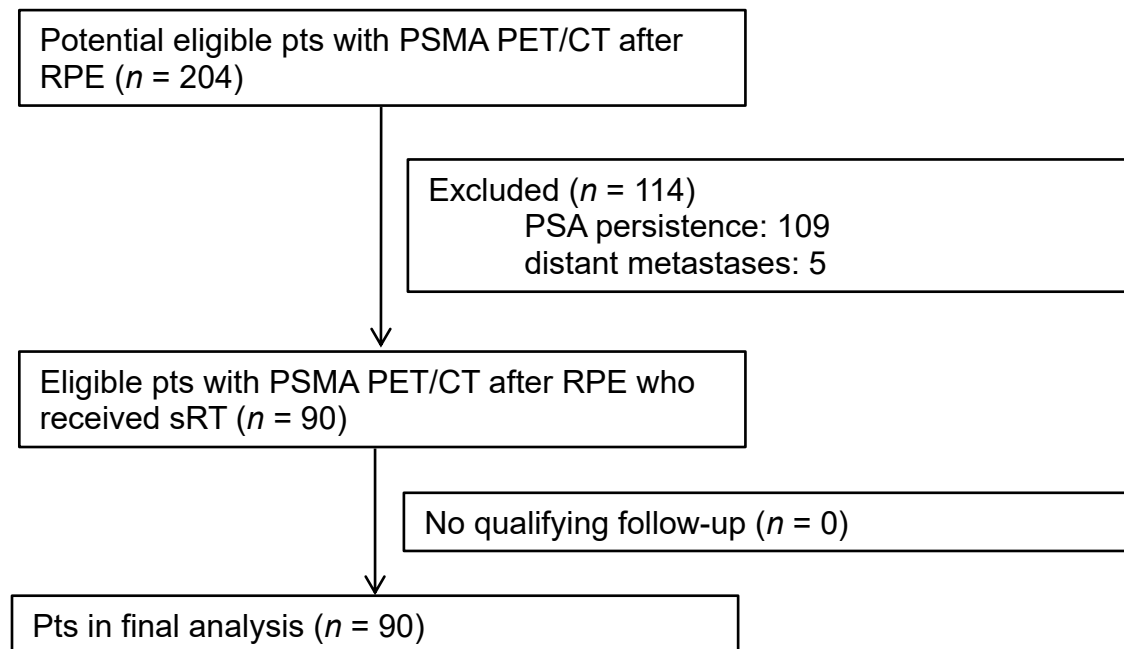

Flow chart (modified from the CONSORT 2010 Flow diagram).

Abbreviations: pts = patients, RPE = radical prostatectomy.

Supplemental Table 1: Uni- and multivariate Cox-Regression analyses considering biochemical recurrent free survival

|                                                       | Univariate analysis | Multivariate analysis* |                         |
|-------------------------------------------------------|---------------------|------------------------|-------------------------|
|                                                       | p value             | p value                | HR (95% CI)             |
| initial PSA in ng/ml (<10, 10-20, >20)                | 0.779               | 0.808                  | 1.08 (0.58-2)           |
| Gleason Score (<7, 7, >7)                             | 0.485               | 0.726                  | 1.15 (0.53-2.48)        |
| pT (2a, 2b+2c, 3)                                     | 0.953               | 0.844                  | 0.92 (0.38-2.19)        |
| pN (0,1)                                              | 0.346               | 0.529                  | 0.81 (0.42-1.57)        |
| Surgical margins (0,1)                                | 0.204               | 0.858                  | 1.13 (0.3-4.2)          |
| PSA pre sRT in ng/ml (<0.5, ≥0.5)                     | 0.707               | 0.215                  | 1.85 (0.7-4.89)         |
| PET findings (negative, fossa, lymph nodes ± fossa)   | 0.697               | 0.738                  | 1.12 (0.57-2.24)        |
| Dose escalation prostate fossa (≤66.6Gy, >66Gy)       | 0.601               | 0.951                  | 0.97 (0.34-2.79)        |
| Dose escalation pelvic lymph nodes (≤50.4Gy, >50.4Gy) | 0.738               | 0.834                  | 0.95 (0.43-1.87)        |
| ADT during sRT (negative, positive)                   | 0.164               | 0.404                  | 2 (0.39-10.24)          |
| PSA nadir ≤ 0.1ng/ml                                  | <b>&lt;0.001</b>    | <b>0.006</b>           | <b>0.04 (0.004-0.4)</b> |

\*Multivariate analysis was performed including all parameters in all patients. Additionally multivariate analyses was performed including only patient related parameters (PSA, Gleason score, pT stage, pN stage, surgical margins and PET findings) and treatment related parameters (dose escalation to fossa and lymph nodes, ADT) in all patients: none of the parameters was significant (data not shown). Additionally, the multivariate analysis was repeated due to possible confounding bias in patients without ADT (86 patients) and similar results as for the whole collective were observed (data not shown). Bold: significant parameters. Abbreviations: HR = hazard ratio, CI = confidence interval

Supplemental Table 2: Acute and late toxicity according to common terminology criteria for adverse events (CTCAE) v.4.03

| <b>Acute toxicity</b>            |             |             |          | <b>Late toxicity</b>             |             |           |
|----------------------------------|-------------|-------------|----------|----------------------------------|-------------|-----------|
| <b>n and (%) of pts by grade</b> |             |             |          | <b>n and (%) of pts by grade</b> |             |           |
|                                  | <b>1</b>    | <b>2</b>    | <b>3</b> | <b>1</b>                         | <b>2</b>    | <b>3</b>  |
| <b>Bladder</b>                   | 39<br>(43%) | 12<br>(13%) | -        | 18<br>(20%)                      | 12<br>(13%) | 2<br>(2%) |
| <b>Bowel</b>                     | 33<br>(37%) | 14<br>(16%) | -        | 6<br>(7%)                        | 3<br>(3%)   | -         |
| <b>Skin</b>                      | 3<br>(3%)   | -           | -        | -                                | -           | -         |
